# Supplementary material for: RASSF8-mediated transport of Echinoid via the exocyst promotes Drosophila wing elongation and epithelial ordering
Source: PubMed Central journal article supplement (PMC8572004; doi:10.1242/dev.199731), 2021-10-14
Supplement: develop-148-199731-s1.pdf [file develop-148-199731-s1.pdf]

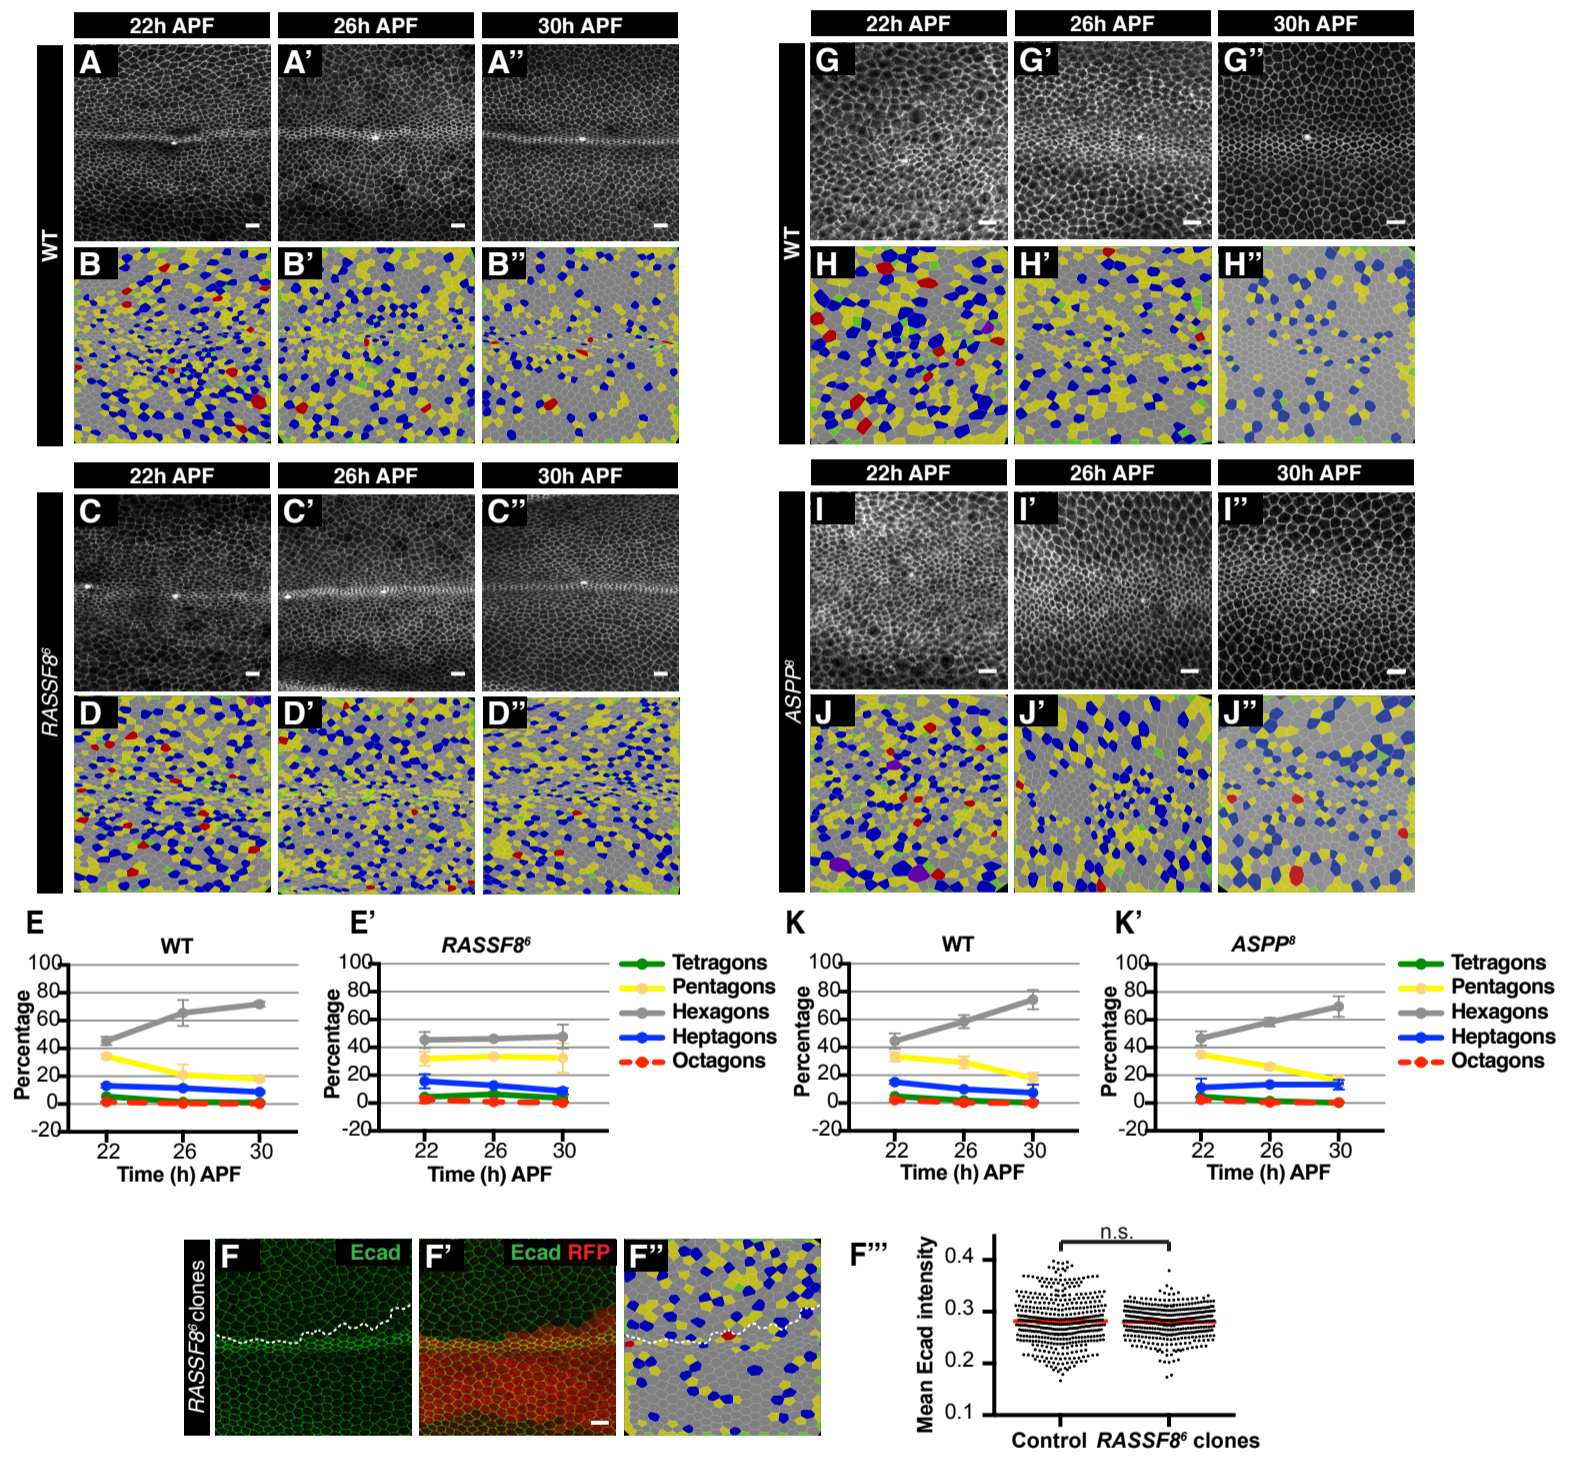

**Fig. S1. Wing cell packing defects in *RASSF8* mutants**

(A-D'') Confocal images of *Ecad::GFP*-labelled wild type (A) and *RASSF8* mutant (C) pupal wings in a region straddling the L3 vein (green rectangle in Fig. 1A) at 22, 26, 30 hours APF. Colour-coded images indicate the number of neighbours for each cell in wild type (B) and *RASSF8* mutant (D). (E-E') Percentage of cells with four, five, six, seven or eight neighbours (colour coded as indicated) in wild type (E) and *RASSF8* mutants (E') (n=2500-5000 cells from 3 to 5 individual wings; error bars = s.d.). (F-F'') *RASSF8* mutants alter hexagonal cell packing cell autonomously. *Ecad::GFP* and merged images of *RASSF8* mutant clones marked by the absence of RFP at 36 hours APF. Clone boundaries are marked by white dotted line. (F''') Quantification of average *Ecad::GFP* intensity per cell at the cell junctions in control and *RASSF8* mutant cells. Error bars = s.e.m.; n=415-451 cells from 3 different wings. Two-tailed Student's t-test: n.s.=not significant (p=0.67). (G-J'') Confocal images of *Ecad::GFP*-labelled wild type (G) and *ASPP* mutant (I) pupal wings in a region straddling the L3 vein (green rectangle in Fig. 1A) at 22, 26, 30 hours APF. Colour-coded images indicate the number of neighbours for each cell in wild type (H) and *ASPP* mutant (J). (K, K') Percentage of cells with four, five, six, seven or eight neighbours (colour coded as indicated) in wild type (K) and *ASPP* mutants (K'). The red line (octagons) has been dashed so the green line (tetragons) can be seen. n=1400-3000 cells from 3 to 8 individual wings; error bars = s.d. Scale bars: 10  $\mu$ m. See Table S1 for raw data.

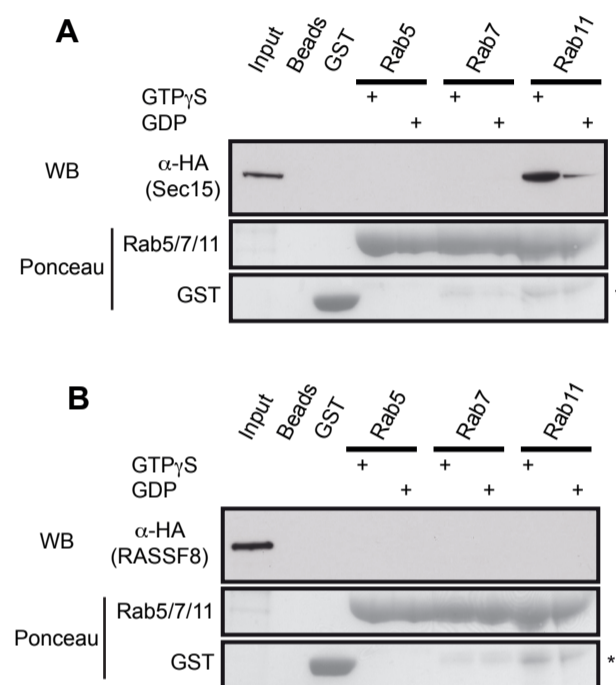

**Fig. S2. RASSF8 does not directly bind to Rab11**

(A, B) GST-pulldown experiments using GST-Rab5 (early endosomes), Rab7 (lysosomes) and Rab11 (recycling or biosynthetic endosomes) with (A) Sec15 or (B) RASSF8. Rab family GTPases were loaded with GTP $\gamma$ S or GDP. As controls, Glutathione beads and GST-only pulldowns were used. Equal protein levels of small GTPases and GST were verified by Ponceau S staining (middle and bottom panels). Asterisks mark degradation products of the small GTPases.

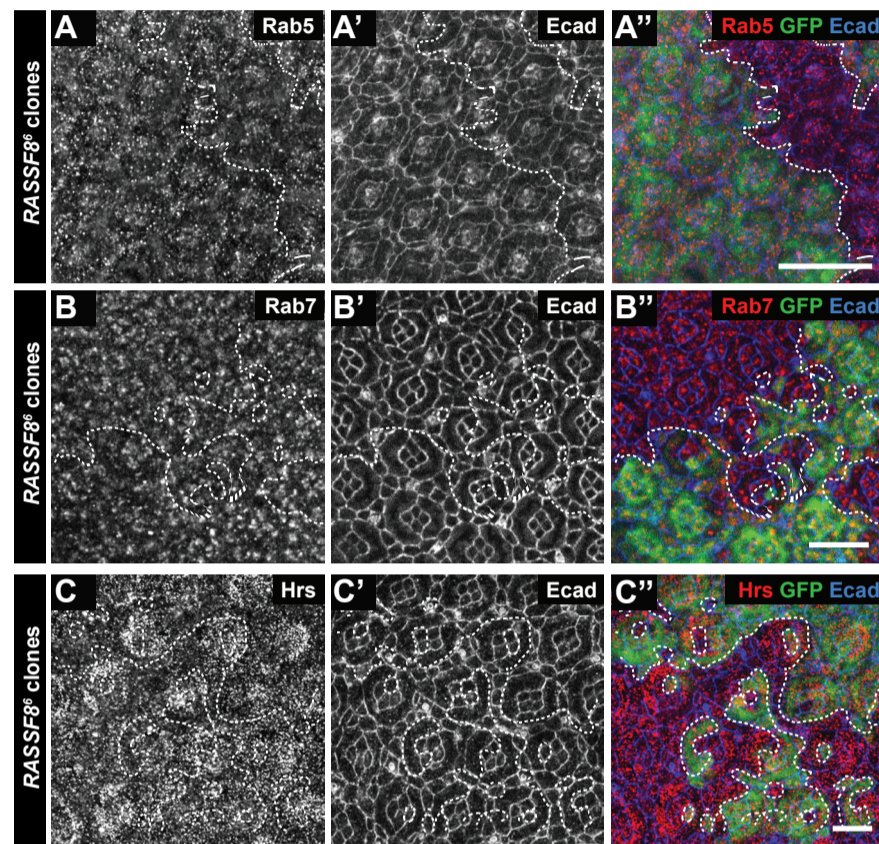

**Fig. S3. Normal Rab5, Rab7 and Hrs localisation in *RASSF8* retinal clones**

(A-C'') Confocal micrographs of pupal retinas at 26 hours APF bearing *RASSF8* mutant clones generated using *eyFLP* and stained as indicated. White dotted lines label the clone boundaries. Staining for Rab5 (A-A''), Rab7 (B-B'') and Hrs (C-C'') is not altered in *RASSF8* mutant pupal retina clones marked by the absence of GFP. Scale bars: 10  $\mu$ m.

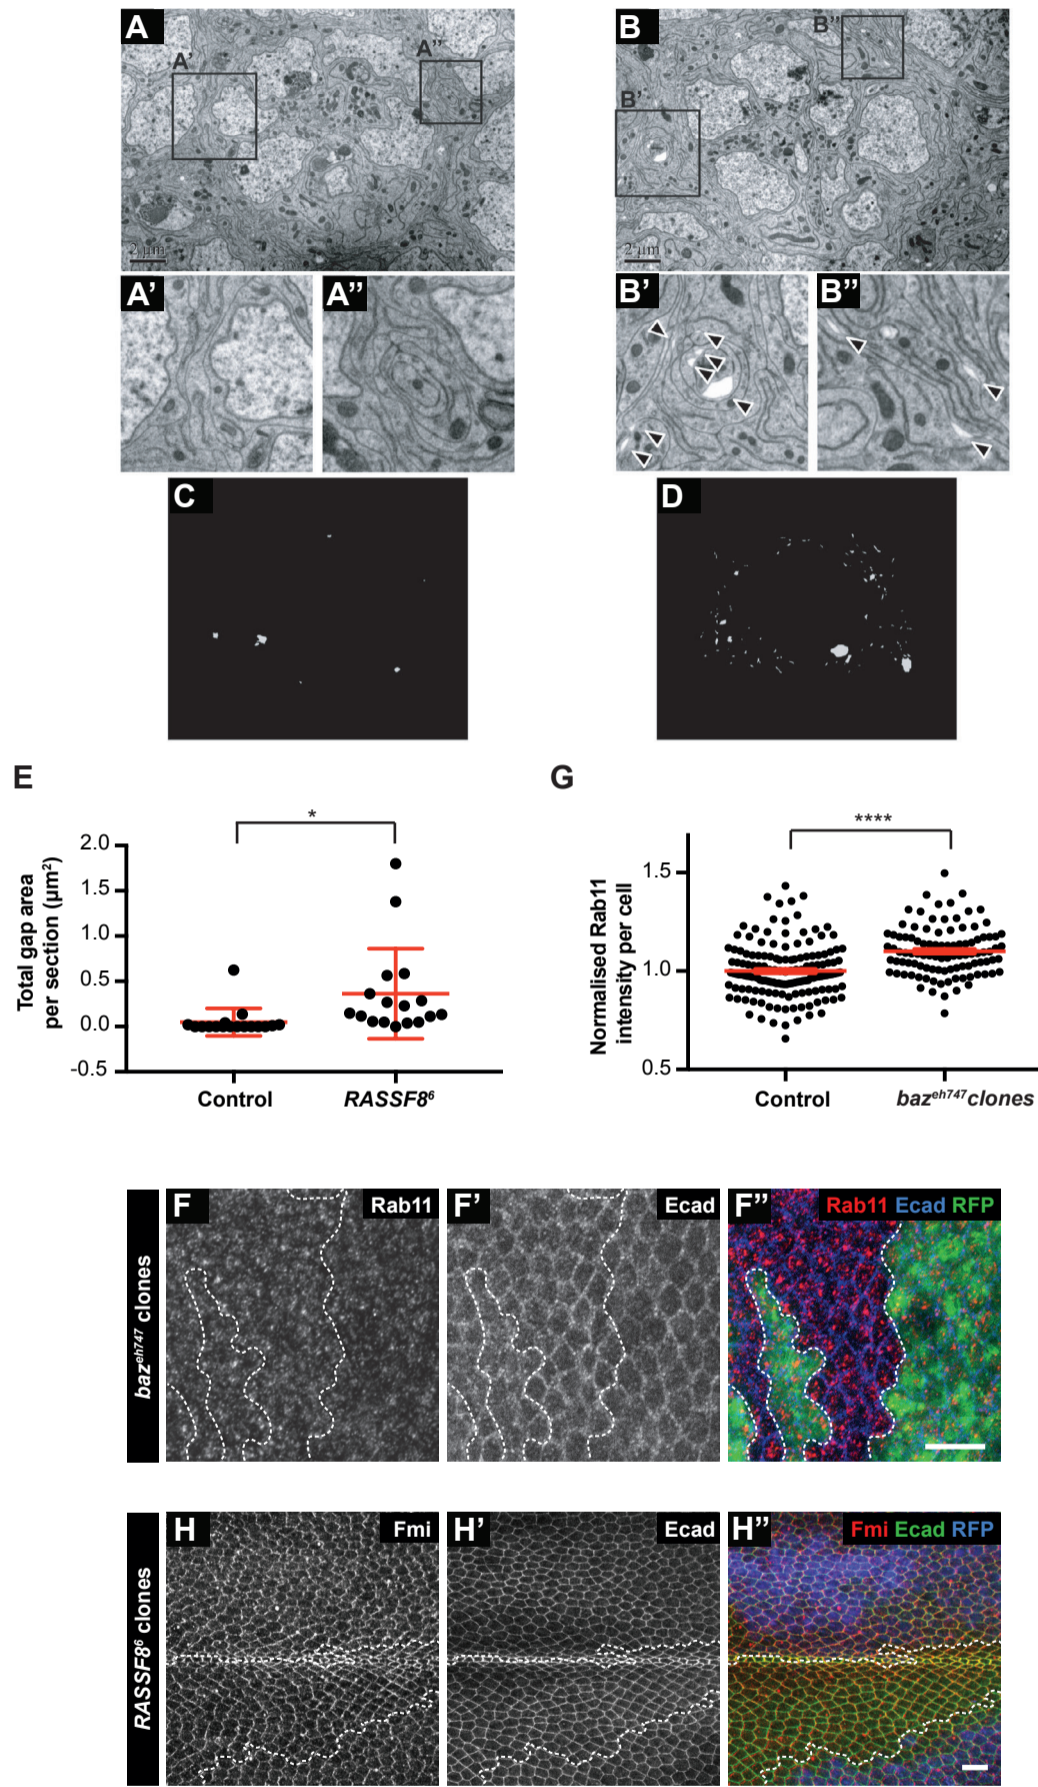

**Fig. S4. Intercellular gaps in *RASSF8* mutant pupal retinas**

Electron micrographs reveal a defect in cell-cell adhesion in *RASSF8* mutant retinas at 26 hours APF. TEM of control (A) and *RASSF8* mutant (B) ommatidia at the level of the apical AJs reveals an increase in gaps at cell-cell junctions. Inserts of representative areas show an absence of gaps in control (A'-A'') and numerous gaps in the mutant (arrows) (B' and B''). The gaps in ommatidia from single plane images (n = 17 images) were quantified by manual segmentation in Amira. The resulting segmentations are shown as a projection of the non-sequential overlaid images for control (C) and mutant (D). (E) Quantification of gap area per section in control and *RASSF8* mutant retinas. Error bars = s.d.; n=17. Two-tailed Student's t-test, \* p = 0.0186. Scale bars in A and B: 2  $\mu$ m. (F-F'') Staining for Rab11 (red) is only modestly increased in *baz* mutant pupal wing clones marked by the absence of RFP (green). Ecad staining is in blue. (G) Quantification of the total intracellular Rab11 fluorescence per cell in control (RFP+) or *baz* mutant (RFP-) cells. The *baz* mutant values were normalised to the control values. Error bars = s.e.m.; n=101-149 cells from 3 different wings. Two-tailed Student's t-test: \*\*\*\* p<0.0001. Scale bar: 10  $\mu$ m. See Table S2 for raw data. (H-H'') *RASSF8* mutant pupal wing clones at 30 hours APF marked by absence of GFP (green stained with anti-Fmi antibody). Polarised staining of Fmi is normal in *RASSF8* and is concentrated on the proximal and distal cell boundaries.

**Table S1.** Raw data and statistics for Figures 1 and S1

[Click here to download Table S1](#)

**Table S2.** Raw data and statistics for Figures 5 and S4

[Click here to download Table S2](#)
